# Supplementary material
Source: publisher figshare collection journal article supplement (https://gsajournals.figshare.com/ndownloader/files/17284274)
Supplement: Supplementary file 1 [file 17284274]

**Supplemental Data (see figshare)**

**Table S1.** A list of the short hairpin RNA (shRNA) strains screened. shRNA strains shaded in green affected growth of the wing, those shaded in yellow were lethal before adulthood, and those shaded in blue yielded viable adults with no overt wing phenotype. The first three columns indicate the DRSC TRiP strain number, the Bloomington Drosophila Stock Center (BDSC) stock number, and the FlyBase gene (FBgn) ID number. TRiP strain numbers shaded in pink are predicted by the DRSC to potentially target multiple genes. Gene snapshots and Gene Ontology (GO) functions were bulk downloaded from FlyBase.
